# Supplementary material for: IGSF10 mutations dysregulate gonadotropin‐releasing hormone neuronal migration resulting in delayed puberty
Source: PubMed Central journal article supplement (PMC4888853; doi:10.15252/emmm.201606250), 2016-04-13
Supplement: EMMM-8-626-s001.pdf [file EMMM-8-626-s001.pdf]

## **Appendix - *IGSF10* regulates embryonic GnRH neuronal migration and mutations result in delayed puberty**

Howard SR, Guasti L, Ruiz-Babot G, Mancini A, David A, Storr HL, Metherell LA, Sternberg MJE, Cabrera CP, Warren HR, Barnes MR, Quinton R, de Roux N, Young J, Guiochon-Mantel A, Wehkalampi K, André V, Gothilf Y, Cariboni A, Dunkel L

### **Table of Contents**

**Appendix Figure S1:** Multiple sequence alignment (m.s.a.) for all four residues harboring *IGSF10* mutations.

**Appendix Figure S2:** Tertiary structure of LRR Region I.

**Appendix Figure S3:** Efficacy of Sp-MO.

**Appendix Table S1:** Rare Variant Burden Testing post Targeted Exome Sequencing

**Appendix Table S2:** Auxological and Pubertal Data of DP patients from the cohort with potentially pathogenic mutations in *IGSF10* as compared to patients without mutations in *IGSF10*.

**Appendix Table S3:** Frequency of *IGSF10* variants in the hypogonadotropic hypogonadism (HH) cohort.

**Appendix Table S4:** Clinical characteristics of two patients with hypothalamic amenorrhea (HA) and HA-equivalent with a shared rare variant in *IGSF10* (NM\_178822: c.7353\_7354insATCA: (rs570110855) p.L2452fs).

A

|                           |                                                    |
|---------------------------|----------------------------------------------------|
| uc011bod.1 hg19/1-2623    | RSLTRLHMDHNNIEFINPEVFFYGLNFLRLVHLEGNQLTKLHPDTFVSI  |
| uc011bod.1 papHam1/1-2612 | RSLTRLHMDHNNIEFINPEVFFYGLNFLRLVHLEGNQLTKLHPDTFVSI  |
| uc011bod.1 rheMac2/1-2593 | RSLTRLHMDHNNIEFINPEVFFYGLNFLRLVHLEGNQLTKLHPDTFVSI  |
| uc011bod.1 calJac1/1-2616 | RSLTRLHMDHNNIEFINPEVFFYGLNFLRLVHLEGNQLTKLHPDTFVSI  |
| uc011bod.1 otoGar1/1-2613 | RSLTRLHMDHNNIEFINPEAFYGLNFLRLVHLEGNQLTKLHPDTFVSI   |
| uc011bod.1 equCab2/1-2594 | RSLTRLHMDHNNIEFINPEVFFYGLTSLRLVHLEGNQLTKLHPDTFVSI  |
| uc011bod.1 canFam2/1-2613 | RSLTRLHMDHNNIEFINPEVFFYGLTFLRLVHLEGNQLTKLHPDTFVSI  |
| uc011bod.1 foxAfr3/1-2602 | RSLTRLHMDHNNIEFINPEVFFYGLSSRLVHLEGNQLTKLHPDTFVSI   |
| uc011bod.1 pteVam1/1-2486 | RNLTRLHMDHNNIEFINPEVFFYGLTFLRLVHLEGNRLTKLHPDTFVSI  |
| uc011bod.1 tarSyr1/1-2484 | RSLTRLHMDHNNIEFINPEVFFYGLNFLRLVQLEGNQLMKLHPDTFVSI  |
| uc011bod.1 myoLuc1/1-2606 | RSLTRLHMDHNNIEFINPEVFFYGLTFLRLVHLEGNRLTKLHPDTFVSI  |
| uc011bod.1 bosTau4/1-2596 | RSLTRLHMDHNNIEFINPEVFFYGLTSLRLVHLEGNQLTKLHPDTFVSI  |
| uc011bod.1 oryCun2/1-2600 | RSLTRLHMDHNNIEFINPEVFFYGLTSLRLVHLEGNRLTKLHPDTFVSI  |
| uc011bod.1 cavPor3/1-2596 | KSLTRLHMDHNNIEFINPEVFFYGLTSLRLVHLEGNQLTKLHPDTFVSI  |
| uc011bod.1 turTru1/1-2388 | RSLTRLHMDHNNIEFINPEVFFYGLTSLRLVHLEGNQLTKLHPDTFVSI  |
| uc011bod.1 tupBel1/1-2456 | RSLTRLHMDHNNIEFINPEVFFYGLTFLRLVHLEGNQLTKLHPDTFVSI  |
| uc011bod.1 ochPri2/1-2450 | WSLTRLHMDHNNIEFINPEVFNGLTFLRLVHLEGNQLTRLHPDTFVSI   |
| uc011bod.1 mm9/1-2574     | RSLTRLHLDHNNIEFINPEAFYGLTSLRLVHLEGNRLTKLHPDTFVSI   |
| uc011bod.1 m4/1-2575      | GSLVRLHLDHNNIEFINPEAFYGLTSLRLVHLEGNRLTKLHPDTFVSI   |
| uc011bod.1 vicPac1/1-2115 | RSLTRLHMDHNNIEFINPEVFFYGLTSLRLVQLEGNQLTKLHPDTFVSI  |
| uc011bod.1 dasNov2/1-2046 | RSLTRLHMDHNNIEFINPEVFSGLTFLRLVHLEGNQLTKLHPDTFVSI   |
| uc011bod.1 monDom5/1-2569 | RNLTRLHLDHNNHLEFINPETFFYGLTSLRLVHLEGNLLTQLHPDTFVSI |
| uc011bod.1 omAna1/1-2567  | KSLIRLHMDHNNIEFINPEAFHGLSALRLVHLEGNFLTCLHPDTFVSI   |
| uc011bod.1 speTri1/1-2163 | RSLTRLHMDHNNIEFINPEAFYGLSSRLVQLEGNQLTKLHPDTFVSI    |
| uc011bod.1 macEug1/1-2272 | RSLTRLHLDHNNHLEFINPETFFYGLTSLRLVHLEGNLLTKLHPDTFVSI |
| uc011bod.1 echTel1/1-2172 | RNLTRLHLDHNNHIEFINPEVFFHGLTFLRLVH-----             |
| uc011bod.1 anoCar1/1-2440 | TSLVRLHMDHNNIEFINPRAFFYGLTSLKLVHLEGNVLLKQLHPDTFVSI |
| uc011bod.1 felCat3/1-1487 | RSLTRLHMDHNNIEFINPEVFFYGLTFLRLVHLEGNQLTKLHPDTFVSI  |
| uc011bod.1 galGal3/1-2319 | KSLVRLHMDHNEIEFVNPNAFFYGLTSLRLVHLEGNLLKQLHPDTFVSI  |
| uc011bod.1 micMur1/1-1332 | RSLTRLHLDHNNIEFINPEAFYGLKFLRLVHLEGNQLTKLHPDTFVSI   |
| uc011bod.1 xenTro2/1-2207 | KNLVRLHMDHNNKLDIEFNPEFFYGLTSLKLVHLEGNLLTQLHTDFTLTI |
| uc011bod.1 taeGut1/1-2072 | NSLVRLHMDHNNIEFVNPVFFYGLTSLRLVHLDGNLLQQLHPDTFVSI   |
| uc011bod.1 gasAcu1/1-2008 | HSLRLHLDHNNIEFISPEAFYGLTQLVHLEGNHLLQQLHPDTFVSI     |
| uc011bod.1 enEur1/1-1515  | RSLTRLHLDHNSVEFINPEVFFHGLSFLRLVHLEGNQLTKLHPDTFVSI  |
| uc011bod.1 oryLat2/1-1751 | DRLLKLYIDHNNIEFINPETLYGLTMLQQLINLESNHLLQQLHPDTFVSI |
| uc011bod.1 fr2/1-1781     | KSLMRLYLDHNNIEFINPEAFYGLTMLQQLVHLEGNHLLQQLHPDTFVSI |
| uc011bod.1 tetNig2/1-1719 | ENLMRLYLDHNNIEFINPEAFYGLTMLQQLVHLESNHLLQQLHPDTFVSI |
| uc011bod.1 danRer6/1-1632 | DNLVRLQLDHNLLIEFINPEFFYGLKRLQQLINLEGNLLQQLHPDTFVSI |
| uc011bod.1 choHof1/1-611  | RSLTRLHMDHNNIEFINPEVFNGLTFLRLVQLEGNHLLTKLHPDTFVSI  |

# B

|            |                |    |     |         |      |        |        |     |         |       |       |       |      |      |   |
|------------|----------------|----|-----|---------|------|--------|--------|-----|---------|-------|-------|-------|------|------|---|
| uc011bod.1 | hq19/1-2623    | NN | IEF | INPEVF  | YGLN | FLRLVH | LEGN   | QLT | KLHPD   | TFVSL | SYLQ  | IFK   | ISF  | I    |   |
| uc011bod.1 | papHam1/1-2612 | NN | IEF | INPEVF  | YGLN | FLRLVH | LEGN   | QLT | KLHPD   | TFVSL | SYLQ  | IFK   | ISF  | I    |   |
| uc011bod.1 | rheMac2/1-2593 | NN | IEF | INPEVF  | YGLN | FLRLVH | LEGN   | QLT | KLHPD   | TFVSL | SYLQ  | IFK   | ISF  | I    |   |
| uc011bod.1 | calJac1/1-2616 | NN | IEF | INPEVF  | YGLN | FLRLVH | LEGN   | QLT | KLHPD   | TFVSL | SYLQ  | IFK   | ISF  | I    |   |
| uc011bod.1 | otoGar1/1-2613 | NN | IEF | INPEAF  | YGLN | FLRLVH | LEGN   | QLT | KLHPD   | TFVSL | SYLR  | IFK   | TSFV |      |   |
| uc011bod.1 | equCab2/1-2594 | NN | IEF | INPEVF  | YGLT | SLRLVH | LEGN   | QLT | KLHPD   | TFVSL | RYLR  | IFK   | TSF  | I    |   |
| uc011bod.1 | canFam2/1-2613 | NN | IEF | INPEVF  | YGLT | FLRLVH | LEGN   | QLT | KLHPD   | TFVSL | RYLR  | IFK   | TSF  | I    |   |
| uc011bod.1 | foxAfr3/1-2602 | NN | IEF | INPEVF  | YGLS | SLRLVH | LEGN   | QLT | KLHPD   | TFVSL | RYLQ  | IFK   | TSF  | I    |   |
| uc011bod.1 | pteVam1/1-2486 | NN | IEF | INPEVF  | YGLT | FLRLVH | LEGN   | RLT | KLHPD   | TFVSL | RYLQ  | IFK   | ISF  | I    |   |
| uc011bod.1 | tarSyr1/1-2484 | NN | IEF | INPEVF  | YGLN | FLRLVQ | LEGN   | QLT | MKLHPD  | TFVSL | SYLQ  | IFK   | TSF  | I    |   |
| uc011bod.1 | myoLuc1/1-2606 | NN | IEF | INPEVF  | YGLT | FLRLVH | LEGN   | RLT | KLHPD   | TFVSL | RYLQ  | IFK   | TSF  | I    |   |
| uc011bod.1 | bosTau4/1-2596 | NN | IEF | INPEVF  | YGLT | SLRLVH | LEGN   | QLT | KLHPD   | TFVSL | RYLQ  | IFK   | TSF  | I    |   |
| uc011bod.1 | oryCun2/1-2600 | NN | IEF | INPEVF  | VGLT | SLRLVH | LEGN   | RLT | KLHPD   | TFVSM | HVLRV | FKVS  | F    | I    |   |
| uc011bod.1 | cavPor3/1-2596 | NN | IEF | INPEVF  | YGLT | SLRLVH | LEGN   | QLT | KLHPD   | TFVSL | RYLQ  | IFK   | TSF  | I    |   |
| uc011bod.1 | turTru1/1-2388 | NN | IEF | INPEVF  | YGLT | SLRLVH | LEGN   | QLT | KLHPD   | TFVSL | CYLR  | IFK   | TSF  | I    |   |
| uc011bod.1 | tupBel1/1-2456 | NN | IEF | INPEVF  | YGLT | FLRLVH | LEGN   | QLT | KLHPD   | TFVSL | SYLQ  | IFK   | TSF  | I    |   |
| uc011bod.1 | ochPn2/1-2450  | NN | IEF | INPEVF  | NGLT | FLRLVH | LEGN   | QLT | RLHPD   | TFVSL | SFLR  | IFKVS | F    | I    |   |
| uc011bod.1 | mm9/1-2574     | NN | IEF | INPEAF  | YGLT | LLRLVH | LEGN   | RLT | KLHPD   | TFVSL | SYLQ  | IFK   | TSF  | I    |   |
| uc011bod.1 | m4/1-2575      | NN | IEF | INPEAF  | YGLT | SLRLVH | LEGN   | RLT | KLHPD   | TFVSL | SYLQ  | IFK   | TSF  | I    |   |
| uc011bod.1 | vicPac1/1-2115 | NN | IEF | INPEVF  | YGLT | SLRLVQ | LEGN   | QLT | KLHPD   | TFVSL | RYLR  | IFK   | TSF  | I    |   |
| uc011bod.1 | dasNov2/1-2046 | NN | IEF | INPEVF  | SGLT | FLRLVH | LEGN   | QLT | KLHPD   | TFVSL | RYLQ  | IFK   | TSF  | I    |   |
| uc011bod.1 | monDom5/1-2569 | NH | LEF | INPETF  | YGLT | SLRLVH | LEGN   | LLT | QLHPN   | TFVSM | SYLQ  | IFK   | ISF  | I    |   |
| uc011bod.1 | omAna1/1-2567  | NN | IEF | INPEAF  | HGLS | ALRLVH | LEGN   | FLT | KLHPD   | TFVSL | RFLQ  | TFP   | ISF  | I    |   |
| uc011bod.1 | speTr1/1-2163  | NN | IEF | INPEAF  | YGLS | SLRLLQ | LEGN   | QLT | KLHX    |       |       |       |      |      |   |
| uc011bod.1 | macEug1/1-2272 | NH | LEF | INPETF  | YGLT | SLRLVH | LEGN   | LLT | QLHPN   | TFVSL | GYFQ  | IFK   | ISFV |      |   |
| uc011bod.1 | echTel1/1-2172 | NH | IEF | INPEVF  | HGLT | FLRLVH |        |     |         |       |       |       |      |      |   |
| uc011bod.1 | anoCar1/1-2440 | NQ | IEF | INPRAF  | YGLT | SLKLVH | LEGN   | VV  | KQLHPD  | TFVTL | SYLR  | MFK   | TSAT |      |   |
| uc011bod.1 | felCat3/1-1487 | NN | IEF | INPEVF  | YGLT | FLRLVH | LEGN   | QLT | KLHPD   | TFVSL | OYLR  | IFK   | ISF  | I    |   |
| uc011bod.1 | galGal3/1-2319 | NE | IEF | VNPNAF  | YGLT | SLRLVH | LEGN   | LL  | KQLHPD  | TFVTS | SYLR  | IFKAS | SI   |      |   |
| uc011bod.1 | micMur1/1-1332 | NN | IEF | INPEAF  | YGLK | FLRLVH | LEGN   | QLT | KLHPD   | TFVSL | SYLR  | IFK   | ISF  | I    |   |
| uc011bod.1 | xenTro2/1-2207 | NK | LDF | INPESF  | YGLT | SLKLVH | LEGN   | LLT | QLHTD   | FTL   | TR    | YIH   | IFK  | TSSI |   |
| uc011bod.1 | taeGut1/1-2072 | NO | TEF | VNPVNF  | YGLT | SLRLVH | LEGN   | LL  | QQLHPD  | TFVTL | RYSH  | IFR   | ISF  | L    |   |
| uc011bod.1 | gasAcu1/1-2008 | NH | IEF | TSPEAF  | YGLT | QQLVH  | LEGN   | H   | LQQLHPD | TFIT  | LRHSQ | VFKV  | SSV  |      |   |
| uc011bod.1 | enEur1/1-1515  | NS | VEF | IHPEVF  | HGLS | FLRLVH | LEGN   | QLT | KLHPD   | TFVSL | NYLQ  | LFKR  | SSI  |      |   |
| uc011bod.1 | oryLat2/1-1751 | NQ | IEF | IHPETLY | YGLT | NLQLIN | LEGN   | H   | LQQLHPD | TFIT  | MRHSQ | VFK   | ISV  |      |   |
| uc011bod.1 | fr2/1-1781     | NH | IEF | INPEAF  | YGLT | NLQLVH | LEGN   | H   | LQQLHPD | TFIT  | MRYSQ | VFKV  | SSV  |      |   |
| uc011bod.1 | fetNig2/1-1719 | NQ | IEF | INPEAF  | YGLT | NLQLVH | LEGN   | H   | LQQLHPD | TFIT  | MRHNQ | VFKV  | SSV  |      |   |
| uc011bod.1 | danRer6/1-1632 | NL | ITF | IHPESF  | YGLK | RLLQ   | INLEGN | Q   | LQQLHPD | TFIS  | VRF   | GQIL  | KWSS | L    |   |
| uc011bod.1 | choHof1/1-611  | NH | IEF | INPEVF  | NGLT | FLRLVQ | LEGN   | H   | LT      | KLHPD | TFVSL | RYLQ  | IFK  | TSF  | I |

C

QUERY/1-2623

sp|UPI0001D554F6#1/1-2600  
sp|F6PVH4#1/1-2592  
sp|F6YCA0#1/1-2622  
sp|F7AW34#1/1-2601  
sp|F6VQH4#1/1-2611  
sp|E2R3I3#1/1-2629  
sp|F1PFP3#1/1-2580  
sp|F1SJM8#1/1-2601  
sp|UPI000223546E#1/1-2619  
sp|G3SKZ8#1/1-2603  
sp|G1LQJ6#1/1-2508  
sp|UPI0000F3412A#1/1-2612  
sp|G1PIE5#1/1-2620  
sp|UPI0001CE2CF7#1/1-2610  
sp|G1SPW0#1/1-2604  
sp|UPI0001CE2CF8#1/1-2593  
sp|UPI00022B71CB#1/1-2612  
sp|UPI000228BF17#1/1-2588  
sp|E1BAU3#1/1-2374  
sp|Q3V1M1#1/1-2594  
sp|G3V7S1#1/1-2597  
sp|Q6WRH9#1/1-2597  
sp|D4A6F8#1/1-2591  
sp|F7GEA8#1/1-2611  
sp|G3WYX0#1/1-2597  
sp|F6UBY5#1/1-2627  
sp|G1KH94#1/1-1047  
sp|UPI0002038D23#1/1-1047  
sp|F1NB34#1/1-1001  
sp|UPI0000E80BF7#1/1-986  
sp|F7CT64#1/1-978  
sp|UPI0001DE89C7#1/1-977  
sp|F6UBY5#2/1-919  
sp|UPI00022B4307#1/1-1001  
sp|G3P7F4#1/1-1012  
sp|F6WKJ8#2/1-569  
sp|F6PVG4#2/1-569  
sp|UPI00016E96F2#1/1-1104  
sp|UPI00016E96F3#1/1-1104

NGLYTNRTV I KATAVRHSKKHFDCRA E STPSPEVMWIMPDN I FLTAPYYGS  
NGLYTNRTV I KATAVRHSKKHFDCRA E STPSPEVMWIMPDN I FLTAPYYGS  
NGLYTNRTV I KATAVRHSKKHFDCRA E STPSPEVMWIMPDN I FLTAPYYGS  
NGLYTNRTV I KATAVRHSKKHFDCRA D STPPPEVTWIMPDN I FLTAPYYGS  
NGLYTNRTV I KATAVRHSKKHFDCRA D STPPPEVTWIMPDN I FLTAPYYGS  
NGLYINKTV I KATAVRHSKKHFDCRA E STPSPKIMWIVPDNL FLTAPYYGS  
NGLYTNKTV I KATAVRHSKKHFDCRA E STPAPOIMWIMPDN I FLTAPYYGS  
NGLYTNKTV I KATAVRHSKKHFDCRA E STPAPOIMWIMPDN I FLTAPYYGS  
NGLYTNKTV M KATAVRHSKKHFDCRA E STPSPOIMWIMPDN I FLTAPYYGS  
NGLYTNRTVMRVTAVRHSKKHFDCRA E STPAQVWTWIMPDN I VLTAPYYGS  
NGLYTNRTVMRVTAVRHSKKHFDCRA E STPAQVWTWIMPDN I VLTAPYYGS  
NGLYTNKTV I KTTAVRHSKKHFDCRA E STPSPOIMWIMPDN I FLTAPYYGS  
NGLYANKTV I KATAVRHSKRHFDCRA E STPSPOIMWIMPDN I FLTAPYYGS  
NGLYTNKTV I KATAVRHSKKHFDCRA E STPSQVWTWIMPDN I FLTAPYHGS  
NGLYTNKTV L RVTAVRHSKKHLDCRA E STPPQVMWIMPDN I FLTAPHDGG  
NGLYTNKTV L RVTAVRHSKKHLDCRA E STPPQVMWIMPDN I FLTAPHDGG  
NGLYRNKTV I KATAVRHSKKHLDCRA E STPSPOIMWIMPDN I LLTAPYYGS  
NGLYTNKTV L KATAVOHSKKHFDCRA D G I PPPQIVWIMPGN I FLTAPYYGS  
NGLYANKTV I KATAVRHSKRHFDCRA E STPSPOIMWIMPDN I FLTAPYYGS  
NGLYANKTV I KATAIQHSKKHLDCRA D G V PPPQITWIMPDN I FLTAPYYGG  
NGLYANKTV I KATAIRHSKKYFDCRA D G I PSSQVTWIMPGN I FLAPYFGS  
NGLYANKTV I KATAIRHSKKYFDCRA D G I PSSQVTWIMPGN I FLAPYFGS  
NGLYANKTV I KATAIRHSKKYFDCRA D G I PSSQVTWIMPGN I FLAPYFGS  
NGLYSNKTV I RATAVRHSKKYLDCRA E STPPPOIMWIMPDN I FLTAPYYGS  
NGLYSNKTV I KATAIQHSKKYLDCRA E STPPPEIMWIMPDN I FLTAPYYGS  
NSWYANKTV I KTTAVRHSKKHIDCRA E G M PPPQIMWIMPDH I FLTAPYYGS  
NGLYTNKTV I KMTA I KHSKKQIDCRA E STPVPOIMWIMPDN I FLTAPYYGS  
NGLYTNKTV I KMTA I KHSKKQIDCRA E STPVPOIMWIMPDN I FLTAPYYGS  
NGLYTNKTV I KVTAVRHSKKQIDCRA E STPPPOIMWIMPDN I FLTAPYYGS  
NGLYTNKTV I KVTAVRHSKKQIDCRA E STPPPOIMWIMPDN I FLTAPYYGS  
NGLYSNKS I I KDTA I KHSRKLIDCKA E GAAPLQVMWIMPDN I YLTAPYHGS  
NGLYSNKS I I KDTA I KHSRKLIDCKA E GAAPLQVMWIMPDN I YLTAPYHGS  
NSWYANKTV I KTTAVRHSKKHIDCRA E G M PPPQIMWIMPDH I FLTAPYYGS  
NGYHONRTV I KE I VSTYSRKLIDCMA E STPRPTITWIMPDN I FLTAPYFGS  
NGYRONRTV I KDVAAKYSRKFIDCKA E GNPTPTITWIMPDN I FLTAPYFGS  
NGLYTNRTV I KATAVRHSKKHFDCRA E STPSPEVMWIMPDN I FLTAPYYGS  
NGLYTNRTV I KATAVRHSKKHFDCRA E STPSPEVMWIMPDN I FLTAPYYGS  
NGYQONRTV I KDVAVKFSRKLIDCEA E GNPTPTITWIMPDN I FLTAPYIGS  
NGYQONRTV I KDVAVKFSRKLIDCEA E GNPTPTITWIMPDN I FLTAPYIGS

## D

```

QUERY/1-2623          LSTASKERTHGS EQLHLOGTLV IONPQSDSGI YKCTAKNPLGSD AATYIQVI--
sp|UPI0001D554F6#1/1-2600  LSTASKERTRGS EQLHLOGTLV IONPQSDSGI YKCTAKNPLGSD AATYIQVI--
sp|F6PVH4#1/1-2592      LSTASKERTRGS EQLHLOGTLV IONPQSDSGI YKCTAKNPLGSD AATYIQVI--
sp|F6YCA0#1/1-2622     DSTASKGRIRGS EQLHLOGTLV IONPQASDGGI YKCTAKNPLGSD AATYIEVI--
sp|F7AW34#1/1-2601     DSTASKGRIRGS EQLHLOGTLV IONPQASDGGI YKCTAKNPLGSD AATYIEVI--
sp|F6VQH4#1/1-2611     FSMANRGRTHGMRPFHPRGALV IONPQPSDGGI YKCAAKNPLGSD ATTYIQVI--
sp|E2R313#1/1-2629     LSMPNKGARGPEPFHPRGTLV IONPQSDSGI YKCTARNSLGSD ATTYVQVI--
sp|F1PFP3#1/1-2580     LSMPNKGARGPEPFHPRGTLV IONPQSDSGI YKCTARNSLGSD ATTYVQVI--
sp|F1SJM8#1/1-2601     FSGADIGRMSGIQSFHPRGTLV IONPQSDSGI YKCTAKNPLGSD ATTYIQVI--
sp|UPI000223546E#1/1-2619 LSMAGKQWP - - - - HPOGTII IONPQSDSGI YKCIARNPLGSD TTTYVQVI--
sp|G3SKZ8#1/1-2603     LSMAGKQWP - - - - HPOGTII IONPQSDSGI YKCIARNPLGSD TTTYVQVI--
sp|G1LQI6#1/1-2508     LSMANKGGTORLEPFHPOGTLV IONPQSDSGI YKCTARNPLGSD ATTYVQVI--
sp|UPI0000F3412A#1/1-2612 FSAANKGRTRRIRPFYPOGTLV IONPQSDSGI YKCTAKNSLGSD ATTYIRVI--
sp|G1PIE5#1/1-2620     LSMANRGRTHGTELFHPOGTLV IONPQSDSGI YKCTARNALGSD ATTYMQVI--
sp|UPI0001CE2CF7#1/1-2610 LSTGSEGRTYRREVLVYPOGTLV IONPQSDSGI YKCTARNALGSD ATTYIRVI--
sp|G1SPW0#1/1-2604     LSTGSEGRTYRREVLVYPOGTLV IONPQSDSGI YKCTARNALGSD ATTYIRVI--
sp|UPI0001CE2CF8#1/1-2593 LSTGSEGRTYRREVLVYPOGTLV IONPQSDSGI YKCTARNALGSD ATTYIRVI--
sp|UPI00022B71CB#1/1-2612 LSRTSKRRISESELLHPOGTLV IONSQSDSGI YKCIKNPFGSD ATTYVQVI--
sp|UPI000228BF17#1/1-2588 LSKARERKTLRGELLYPOGTLV IQDLQSDSGVYKCKAONLLGSD ATTYVQVI--
sp|E1BAU3#1/1-2374     FSAANKGRTRRIRPFYPOGTLV IONPQSDSGI YKCTAKNSLGSD ATTYIRVI--
sp|Q3V1M1#1/1-2594     LSTATERRPHRSEMLLPOGTLV IONLRASDSGVYKCKRAONVLLGSD ATTYIQVL--
sp|G3V7S1#1/1-2597     LSKATARKPHRSEMLHPOGTLV IONLQSDSGVYKCKRAONLLGSD ATTYIQVL--
sp|Q6WRH9#1/1-2597     LSKATARKPHRSEMLHPOGTLV IONLQSDSGVYKCKRAONLLGSD ATTYIQVL--
sp|D4A6F8#1/1-2591     LSKATARKPHRSEMLHPOGTLV IONLQSDSGVYKCKRAONLLGSD ATTYIQVL--
sp|F7GEA8#1/1-2611     LSAAKVRSRSTGSELLRPOGTLV IONPKTSDSGMYTCTAKNPLGSD ATTYVQVI--
sp|G3WYX0#1/1-2597     LSAASRVRSTRSELLHPOGTLV IONPKTSDSGMYTCTAKNOLGSD ATTYVQVI--
sp|F6UBY5#1/1-2627     LSTAGGRRSSGSELLHPRGTLV IONPQSDSGVYKCTAKNOLGSD SAMTYIRV--
sp|G1KH94#1/1-1047     LSTGSKGRPSGSELLHPOGTLV IONPRSSHSGI YKCMKNOLGSD TVSYVQVI--
sp|UPI0002038D23#1/1-1047 LSTGSKGRPSGSELLHPOGTLV IONPRSSHSGI YKCMKNOLGSD TVSYVQVI--
sp|F1NB34#1/1-1001     LSTGNHGRASGSELLHPOGTLR IONPQPSDGGI YKCTARNHLGSD TVTYIHVI--
sp|UPI0000E80BF7#1/1-986 LSTGNHGRASGSELLHPOGTLR IONPQPSDGGI YKCTARNHLGSD TVTYIHVI--
sp|F7CT64#1/1-978     LSTASQGLTGTTELLHPOGTLV IONPQSDSGI YKCIKNSLGSD MSKTYLNV--
sp|UPI0001DE89C7#1/1-977 LSTASQGLTGTTELLHPOGTLV IONPQSDSGI YKCIKNSLGSD MSKTYLNV--
sp|F6UBY5#2/1-919     -----
sp|UPI00022B4307#1/1-1001 LSAAEKGRPMGSELLHPOGTLV IQRPTPSDGGI YKCLAKNHLGSD SKVAVVLV--
sp|G3P7F4#1/1-1012     LSAAERGRPMGSELLHPOGTLV IQRPKASDGGI YKCLAKNHLGSD SKITYVVL--
sp|F6WK18#2/1-569     LSTASKERTRGS EQLHLOGTLV IONPQSDSGI YKCTAKNPLGSD AATYIQVI--
sp|F6PVG4#2/1-569     LSTASKERTRGS EQLHLOGTLV IONPQSDSGI YKCTAKNPLGSD AATYIQVI--
sp|UPI00016E96F2#1/1-1104 LSTHQGRPMGSELLHPHGTLV IQRSSVADTGRYKCLAQNYLGD SKVTYVRVL--
sp|UPI00016E96F3#1/1-1104 LSTHQGRPMGSELLHPHGTLV IQRSSVADTGRYKCLAQNYLGD SKVTYVRVL--

```

## Appendix Figure S1

### Multiple sequence alignment (m.s.a.) for all four residues harboring *IGSF10* mutations.

M.s.a. for residues R156 (A), E161 (B), E2264 (C) and D2614 (D). M.s.a. was generated using Polyphen2 version 2.2.2, which retrieves homologues (both orthologs and paralogs, here displayed according to their Uniprot Id) using Blast+. M.s.a. is displayed using Jalview applet. Residues are colored according to the percentage of the residues in each column that agree with the consensus sequence (percentage identity color scheme in Jalview, dark blue >80%, white < 40%).

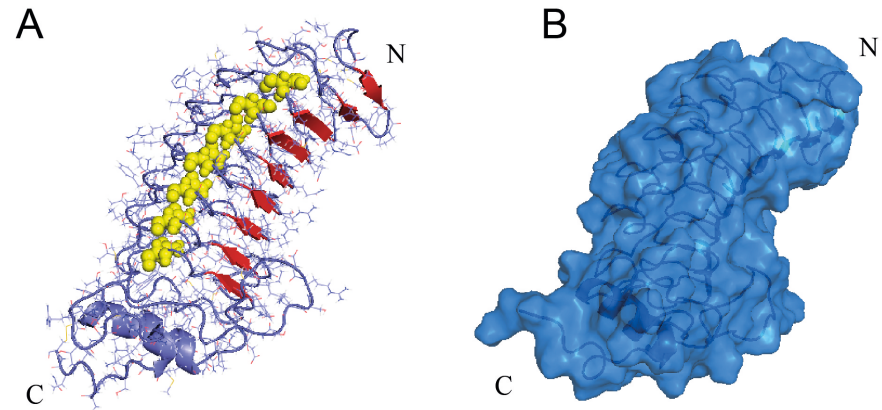

## Appendix Figure S2

### Tertiary structure of LRR Region I.

Panel A: Beta strands are displayed in red and the asparagine ladder in yellow. Panel B: the 'arc' shape of LRR region I.

|                  |                                                                                                                                          |
|------------------|------------------------------------------------------------------------------------------------------------------------------------------|
| Mispair<br>Sp-MO | GGAGACATCCAGACAGCTGTGGAAAGAATTAACCTGGGGTATA-----<br>GGAGACATCCAGACAGCTGTGGAAAGAATTAACCTGGGGTAAAACCTACAACAGGCAAAC<br>***** *              |
| Mispair<br>Sp-MO | -----<br>CACCGCTGAAATTTCTCGAGAAATGCAATCGAAACTGCTTACTTGAGCTCAGTTCCTCTG                                                                    |
| Mispair<br>Sp-MO | -----ACAGTTTGTCAAGTCTTCAAGCGAACGSTCTCTYGGG<br>TGCAATTTTGTGTTTCAGGTATAACAGTTTGTCAAGTCTTCAAGCGAACGnTCTCTNGGG<br>***** **                   |
| Mispair<br>Sp-MO | ACTGAATAAGCTGGAAYTGTTAATGCTGCATAGTAACATGATCAAAACTGTnGAGGACAG<br>ACTGAATAAGCTGGAANTGTTAATGCTGCATAGTAACATGATCAAAACTGTnGAGGACAG<br>***** ** |

**Appendix Figure S3**  
**Efficacy of Sp-MO.**

Nucleotide sequence obtained from RNA of *Igsf10* Sp-MO injected embryos showing an insertion of 97 nucleotides in the splice site of the second exon. Apostrophes denote homology.

**Appendix Table S1: Rare Variant Burden Testing post Targeted Exome Sequencing**

| Gene          | Total number of rare (MAF <2.5%) and predicted damaging* variant alleles in probands and in the reference population |                                | P value  | Adjusted P value** |
|---------------|----------------------------------------------------------------------------------------------------------------------|--------------------------------|----------|--------------------|
|               | In DP cohort (n=49)                                                                                                  | In ExAC Finn database (n=3305) |          |                    |
| <b>HS6ST1</b> | 4                                                                                                                    | 3                              | 3.23E-06 | 3.01E-05           |
| <b>LRRIQ3</b> | 12                                                                                                                   | 88                             | 1.66E-07 | 4.65E-06           |
| <b>EAP1</b>   | 8                                                                                                                    | 39                             | 1.42E-06 | 1.99E-05           |
| <b>IGSF10</b> | 13                                                                                                                   | 292                            | 0.0029   | 0.020              |
| <b>SEC24A</b> | 3                                                                                                                    | 17                             | 0.0051   | 0.029              |
| <b>ZNF560</b> | 2                                                                                                                    | 6                              | 0.00823  | 0.038              |
| <b>FTO</b>    | 3                                                                                                                    | 29                             | 0.0188   | 0.058              |
| <b>LGR4</b>   | 8                                                                                                                    | 172                            | 0.0155   | 0.058              |
| <b>CYFIP1</b> | 2                                                                                                                    | 10                             | 0.01852  | 0.058              |
| <b>TTF1</b>   | 7                                                                                                                    | 96                             | 0.023    | 0.064              |
| <b>THBS4</b>  | 3                                                                                                                    | 33                             | 0.02574  | 0.066              |
| <b>INHA</b>   | 3                                                                                                                    | 39                             | 0.0384   | 0.090              |
| <b>SYPL2</b>  | 5                                                                                                                    | 114                            | 0.04472  | 0.096              |
| <b>ELFN2</b>  | 2                                                                                                                    | 22                             | 0.06745  | 0.135              |
| <b>SETBP1</b> | 2                                                                                                                    | 25                             | 0.0829   | 0.155              |
| <b>TBX6</b>   | 4                                                                                                                    | 102                            | 0.1204   | 0.211              |



|                 |   |     |        |       |
|-----------------|---|-----|--------|-------|
| <b>FANCL</b>    | 3 | 78  | 0.175  | 0.288 |
| <b>ZNF266</b>   | 2 | 54  | 0.236  | 0.367 |
| <b>HTR3D</b>    | 2 | 60  | 0.3035 | 0.433 |
| <b>ICAM3</b>    | 1 | 20  | 0.315  | 0.433 |
| <b>BCLAF1</b>   | 4 | 393 | 0.3249 | 0.433 |
| <b>ARHGEF16</b> | 3 | 100 | 0.4329 | 0.551 |
| <b>CUX1</b>     | 1 | 39  | 0.5141 | 0.626 |
| <b>CPZ</b>      | 2 | 196 | 0.5867 | 0.684 |
| <b>PANX3</b>    | 2 | 120 | 1      | 1     |
| <b>WDR25</b>    | 2 | 126 | 1      | 1     |
| <b>ERCC4</b>    | 3 | 202 | 1      | 1     |
| <b>LRRN1</b>    | 0 | 4   | 1      | 1     |

Minor allele frequency (MAF) data was retrieved from the ExAC Browser (Exome Aggregation Consortium (ExAC), Cambridge, MA: <http://exac.broadinstitute.org>, accessed October 2015). \*by both SIFT (1) and Polyphen2 (2). P value calculated by Fisher's exact test. \*\*Benjamini & Hochberg method (3)

**Appendix Table S2: Auxological and Pubertal Data of DP patients from the cohort with potentially pathogenic mutations in *IGSF10* as compared to patients without mutations in *IGSF10*.**

| <b>Males</b>                   |                                                    |                                                       |    |
|--------------------------------|----------------------------------------------------|-------------------------------------------------------|----|
|                                | DP patients with <i>IGSF10</i> mutations (mean±SD) | DP patients without <i>IGSF10</i> mutations (mean±SD) |    |
|                                | n=18                                               | n=64                                                  |    |
| <b>Birth weight (kg)</b>       | 3.6±0.6                                            | 3.7±0.4                                               | ns |
| <b>Birth length (cm)</b>       | 50.6±1.9                                           | 50.9±1.2                                              | ns |
| <b>Age at G2 stage (yrs)</b>   | 15.2±0.8                                           | 15.2±0.9                                              | ns |
| <b>Age at “take off” (yrs)</b> | 15.0±1.3                                           | 14.9±0.7                                              | ns |
| <b>Age at PHV (yrs)</b>        | 16.3±1.2                                           | 16.1±1.0                                              | ns |
| <b>Adult height (cm)</b>       | 177.0±5.9                                          | 179.3±7.0                                             | ns |
| <b>Females</b>                 |                                                    |                                                       |    |
|                                | DP patients with <i>IGSF10</i> mutations (mean±SD) | DP patients without <i>IGSF10</i> mutations (mean±SD) |    |
|                                | n=8                                                | n=125                                                 |    |
| <b>Birth weight (kg)</b>       | 3.7±0.2                                            | 3.6±0.5                                               | ns |
| <b>Birth length (cm)</b>       | 50.3±2.3                                           | 50.0±2.2                                              | ns |
| <b>Age at B2 stage (yrs)</b>   | 13.5±1.0                                           | 13.8±1.0                                              | ns |
| <b>Age at “take off” (yrs)</b> | 13.3±0.7                                           | 12.5±1.1                                              | ns |
| <b>Age at PHV (yrs)</b>        | 14.5±0.7                                           | 13.4±1.0                                              | ns |
| <b>Adult height (cm)</b>       | 168.5±5.4                                          | 165.1±6.5                                             | ns |

Tables are divided into male and female and compare auxological data and pubertal timing of those DP patients with potentially pathogenic mutations in *IGSF10* (p.Arg156Leu, p.Glu161Lys, p.Glu2264Gly and p.Asp2614Asn) with those without mutations in *IGSF10*. All comparisons were found to be non-significant (ns) by Student's *t* test (2-tailed); G2 – Tanner genital stage 2; B2 – Tanner breast stage 2; “take off” – age at start of pubertal growth spurt; PHV – peak height velocity.

**Appendix Table S3: Frequency of *IGSF10* variants in the hypogonadotropic hypogonadism (HH) cohort.**

| HH cohort (n=334)                                            |                  |                  | ExAC database (n=32200)                                      |                  |                  | P value |
|--------------------------------------------------------------|------------------|------------------|--------------------------------------------------------------|------------------|------------------|---------|
| Total number of rare and predicted damaging variant alleles* | Allele Frequency | Total Prevalence | Total number of rare and predicted damaging variant alleles* | Allele Frequency | Total Prevalence |         |
| 34                                                           | 5.1%             | 10.2%            | 2314                                                         | 3.5%             | 7%               | 0.0329  |

Minor allele frequency (MAF) data for the European control subjects was retrieved from the ExAC Browser (Exome Aggregation Consortium (ExAC), Cambridge, MA: <http://exac.broadinstitute.org>, accessed October 2015). P value calculated by Fisher's exact test. \*rare variants with MAF <2.5% and predicted damaging by both SIFT and Polyphen2

**Appendix Table S4: Clinical characteristics of two patients with hypothalamic amenorrhea (HA) and HA-equivalent with a shared rare variant in *IGSF10* (NM\_178822: c.7353\_7354insATCA: (rs570110855) p.L2452fs).**

| Characteristic                            | Patient 1                                                                   | Patient 2                |
|-------------------------------------------|-----------------------------------------------------------------------------|--------------------------|
| <i>Clinical Characteristics</i>           |                                                                             |                          |
| Gender                                    | Female                                                                      | Male                     |
| Age (yr)                                  |                                                                             |                          |
| At menarche                               | Unknown                                                                     | -                        |
| At diagnosis                              | 25                                                                          | 29                       |
| BMI at diagnosis                          | 25 (low body fat to muscle ratio)                                           | 18                       |
| <i>Predisposing factors</i>               |                                                                             |                          |
| Weight loss                               | No                                                                          | Yes                      |
| Excessive exercise                        | Yes                                                                         | No                       |
| Subclinical eating disorder               | No                                                                          | Yes                      |
| Fertility Status                          | Failed attempt at conception off treatment; undergoing gonadotropin therapy | No attempt at conception |
| Family history of hypothalamic amenorrhea | No                                                                          | No                       |
| <i>Radiological Findings</i>              |                                                                             |                          |
| MRI                                       | Normal pituitary                                                            | Normal pituitary         |
| <i>Biochemical Findings</i>               |                                                                             |                          |
| LH (U/L)                                  | 5.0                                                                         | 0.6                      |
| FSH (U/L)                                 | 5.9                                                                         | 4.1                      |
| Estradiol (E <sub>2</sub> ) (pg/mL)       | <15                                                                         | -                        |
| Testosterone (ng/mL)                      | <0.3                                                                        | 0.8                      |
| Prolactin (mU/L)                          | 129                                                                         | 111                      |
| TFTs                                      | Within normal range                                                         | Within normal range      |
| AMH                                       | 40.3                                                                        | -                        |

The body-mass index (BMI) is the weight in kilograms divided by the square of the height in meters; LH- lutenising hormone; FSH – follicular stimulating hormone; TFTs – thyroid function tests, comprising of free T4 and thyroid stimulating hormone; AMH – anti-mullerian hormone

## References

1. Kumar P, Henikoff S, and Ng PC. Predicting the effects of coding non-synonymous variants on protein function using the SIFT algorithm. *Nature protocols*. 2009;4(7):1073-81.
2. Adzhubei IA, Schmidt S, Peshkin L, Ramensky VE, Gerasimova A, Bork P, Kondrashov AS, and Sunyaev SR. A method and server for predicting damaging missense mutations. *Nature methods*. 2010;7(4):248-9.
3. Benjamini Y, Drai D, Elmer G, Kafkafi N, and Golani I. Controlling the false discovery rate in behavior genetics research. *Behav Brain Res*. 2001;125(1-2):279-84.
